# Supplementary material for: Evolving MRSA: High-level β-lactam resistance in Staphylococcus aureus is associated with RNA Polymerase alterations and fine tuning of gene expression
Source: PLOS journal article supplement (doi:10.1371/journal.ppat.1008672), 2020-07-24
Supplement: S11 (10.1371/journal.ppat.1008672.s011) [file journal.ppat.1008672.s011]

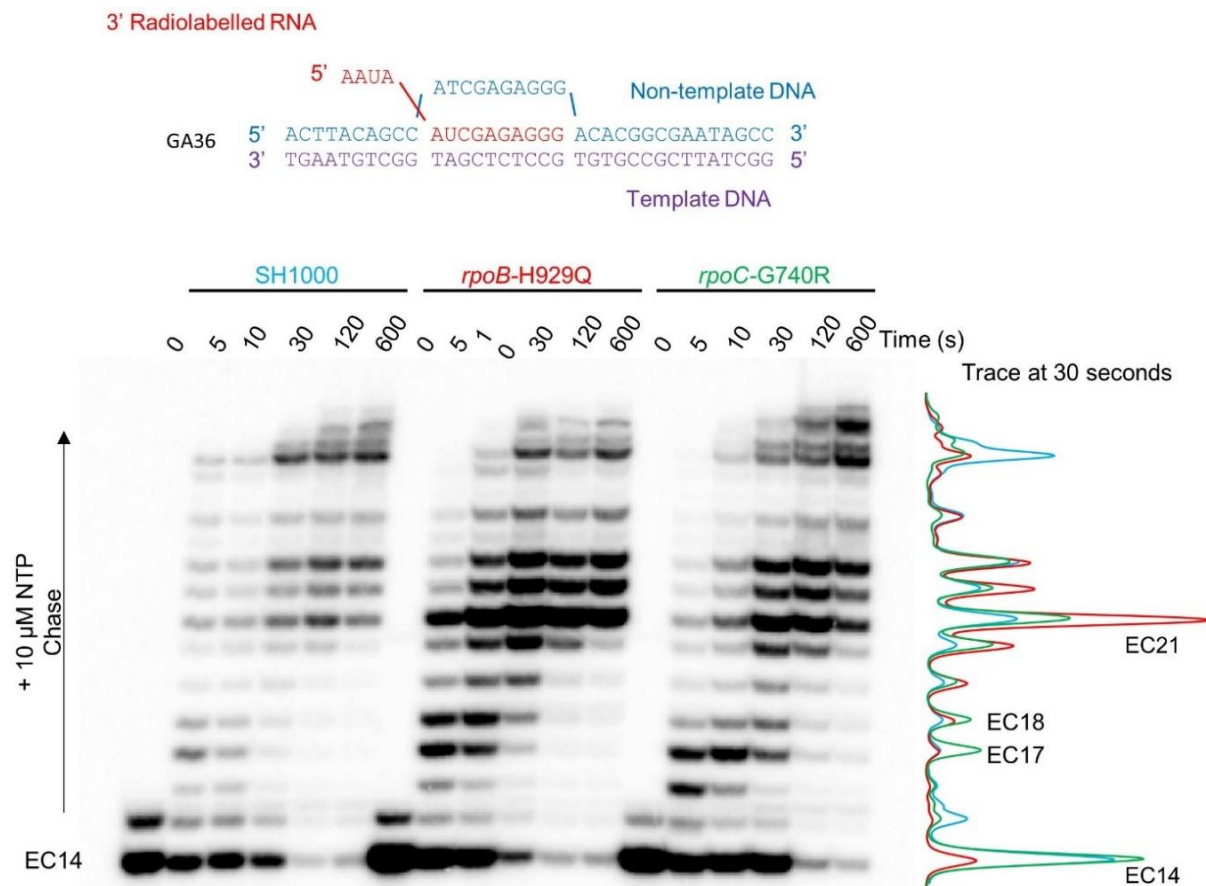

**S3 Figure: Transcription elongation and pausing of SH1000, *lysA::pmecA rpoB*-H929Q and *lysA::pmecA rpoC*-G740R RNAPs.**

The assembled scaffold was used to examine differences in pausing by three RNAPs during elongation. The trace of each reaction at 30 seconds on the 23% w/v polyacrylamide denaturing gels can be seen.
