# Supplementary material for: Evolving MRSA: High-level β-lactam resistance in Staphylococcus aureus is associated with RNA Polymerase alterations and fine tuning of gene expression
Source: PLOS journal article supplement (doi:10.1371/journal.ppat.1008672), 2020-07-24
Supplement: S16 (10.1371/journal.ppat.1008672.s016) [file journal.ppat.1008672.s016]

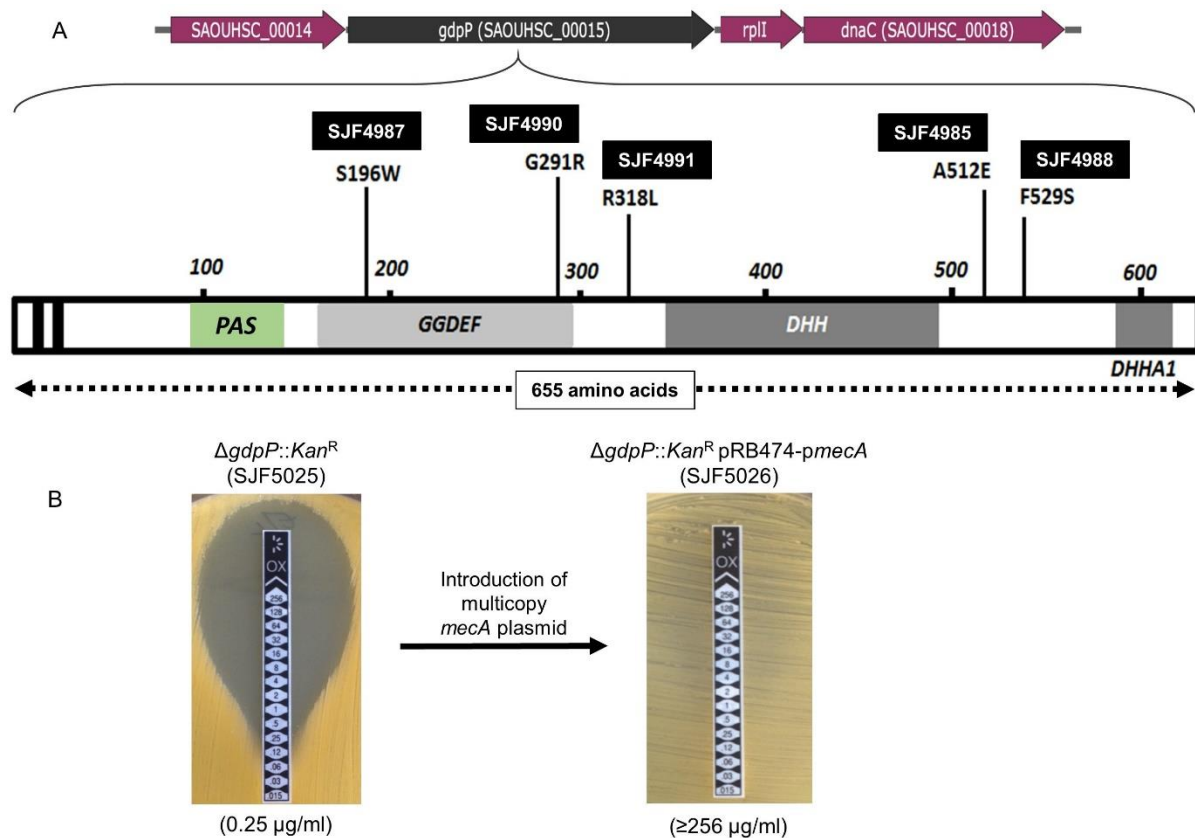

**S8 Figure: Schematic of the GdpP operon, showing the acquired SNPs and effect of *gdpP* deletion on resistance.**

**A)** The genomic region of the *gdpP* operon along with *rplI* and *dnaC* genes. The N-terminus of the GdpP protein contains two transmembrane helices (black boxes), a PAS domain, GGDEF, DHH and DHHA1 domains. Amino acid substitutions identified in highly resistant derivatives of pRB474-*pmecA* (SJF4981) are indicated and strain details are shown in boxes. **B)** The inactivation of *gdpP* in Δ*gdpP*::*kan*<sup>R</sup> (SJF5025) showed susceptibility to oxacillin in the absence of *mecA*. Subsequent introduction of pRB474-*pmecA* into Δ*gdpP*::*kan*<sup>R</sup> (SJF5025) resulted in Δ*gdpP*::*Kan*<sup>R</sup> pRB474-*pmecA* (SJF5026) was accompanied by high-level resistance to oxacillin. The MIC for oxacillin determined by Etest is listed in brackets.
